# Supplementary material
Source: Elsevier journal article supplement (https://www.sciencedirect.com/science/article/pii/S1885585726000290)
Supplement: mmc1 [file mmc1.pdf]

## **SUPPLEMENTARY DATA**

### **Supplementary methods**

#### **SM1. Genetic analysis**

All individuals included in the study were analyzed using a cardiomyopathy gene panel including: *ABCC9, ACTC1, ACTN2, AKAP9, ALPK3, ANK2, ANKRD1, BAG3, CACNA1C, CACNA2D1, CACNB2, CALM1, CALM2, CALM3, CALR3, CASQ2, CAV3, CRYAB, CSRP3, CTNNA3, GJA1, CTF1, DES, DMD, DMPK, DPP6, DSC2, DSG2, DSP, DTNA, ECE1, EMD, EN1, EYA4, FHL2, FHOD3, FKTN, FLNA, FLNC, GAA, GJA5, GLA, GLRA1, GPD1L, HCN2, HCN4, JPH2, JUP, KCNA5, KCND3, KCNE1, KCNE2, KCNE3, KCNE4, KCNE5, KCNH2, KCNJ2, KCNJ5, KCNJ8, KCNQ1, LAMA4, LAMP2, LDB3, LMNA, MYBPC3, MYH6, MYH7, MYL2, MYL3, MYLK2, MYOZ2, MYPN, NEBL, NEXN, NKX2-5, NOS1AP, NOTCH1, NPPA, NUP155, PDLIM3, PHOX2A, PHOX2B, PITX2, PKP2, PLN, PPP1R13L, PRKAG2, RANGRF, RBM20, RYR2, SCN1B, SCN2B, SCN3B, SCN4B, SCN5A, SCN10A, SDHA, SGCD, SLC22A5, SLC6A4, SLC8A1, SLMAP, SLN, SNTA1, TAZ, TCAP, TGFB3, TLX3, TMEM43, TMPO, TNNC1, TNNI3, TNNI3K, TNNT2, TP63, TPM1, TRDN, TRIM63, TRPM4, TTN, TTR* and *VCL*. Libraries were prepared using the SureSelectXT HS/HS2 Target Enrichment System (Agilent), and sequencing was performed on MiSeq and NextSeq 2000 platforms (Illumina). The custom panel captures all coding regions and  $\pm 25$  bp of flanking intronic sequences, achieving  $>20\times$  coverage across the targeted regions and  $>99\%$  sensitivity for SNVs and indels. Regions with a call rate  $<90\%$  at  $20\times$  were resequenced by Sanger sequencing (ABI3500). Bioinformatic analysis was performed using a validated in-house pipeline, including preprocessing with FastQC and fastp, alignment with BWA-MEM (hg19), duplicate marking with Picard, and variant detection with GATK HaplotypeCaller, Manta, GRAPES, and DECoN, followed by annotation using gnomAD, ClinVar, and internal databases. Analysis of copy number variations was performed using Gendical Software. All genes currently associated with CM were included in the panel.

**Table S1.** Clinical and genetic data of patients with early onset nonsyndromic cardiomyopathies included in the cohort

| Patient | Sex    | Clinical diagnosis ESC 2023 | Age at onset, y | Cardiac events             | Genetic diagnosis #OMIM                                                                       | Disease causing gene/potential disease causing gene | Disease causing variant (c.)/potential disease causing variant (c.) | Disease causing variant (p)/potential disease-causing variant (p.) | ACMG classification | Zygoty (inheritance) | Segregation                    | Previously reported                                               | Usefulness of genetic diagnosis              | Uncertain or additional gene Variants                                                                                    | Fibrosis | IVS (z-score) | LVP W (z-score) | LVE DD (z-score) | LVEF (Simpson; %) | BSA  |
|---------|--------|-----------------------------|-----------------|----------------------------|-----------------------------------------------------------------------------------------------|-----------------------------------------------------|---------------------------------------------------------------------|--------------------------------------------------------------------|---------------------|----------------------|--------------------------------|-------------------------------------------------------------------|----------------------------------------------|--------------------------------------------------------------------------------------------------------------------------|----------|---------------|-----------------|------------------|-------------------|------|
| P1      | Male   | HCM                         | 13              |                            | # 115197 cardiomyopathy, familial hypertrophic, 4; CMH4                                       | <i>MYBPC3</i>                                       | c.2149-1G>A                                                         | p.(?)                                                              | P                   | Heterozygous         | Inherited from affected father | PMIDs: 27532257, 30393631, 23782526, 37652022, 36129056, 34588271 | Diagnosis confirmed                          |                                                                                                                          | Present  | 24.86         | 0.51            | -2.33            | 73                | 1.37 |
| P2      | Female | HCM                         | 11              | ICD appropriate shock, HTx | cardiomyopathy, familial hypertrophic, 4; CMH4                                                | <i>MYH7</i>                                         | c.2156G>A                                                           | p.(Arg719Gln)                                                      | P                   | Heterozygous         | Unknown                        | PMIDs:21896538, 23140321, 23711808.                               | Diagnosis confirmed                          |                                                                                                                          | Present  | 20.50         | 0.40            | -2.25            | 71                | 1.43 |
| P3      | Male   | HCM                         | 12              |                            | Potential # 613765 cardiomyopathy, familial hypertrophic, 9; CMH9                             | <i>TTN</i>                                          | c.7021G>T                                                           | p.(Asp2341Tyr)                                                     | VUS*                | Heterozygous         | No                             | Novel                                                             | Potential associated gene-variant identified |                                                                                                                          | Absent   | 11.24         | 9.49            | -1.36            | 75                | 1.56 |
| P4      | Male   | DCM                         | 18              |                            | Potential # 604145 cardiomyopathy, dilated, 1G; CMD1G                                         | <i>TTN</i>                                          | c.34449A>C                                                          | p.(Glu11483Asp)                                                    | VUS*                | Heterozygous         | No                             | Novel                                                             | Potential associated gene-variant identified | <i>TTN</i> : c.89827G>A; p.(Val29943Ile) (VUS) heterozygous                                                              | Absent   | 2.47          | 1.69            | 2.64             | 52                | 1.73 |
| P5      | Male   | ACM/NDL VC                  | 15              | SCA                        | # 617047 arrhythmogenic right ventricular dysplasia, familial, 15, included; ARVD15, includeD | <i>FLNC</i>                                         | c.1414del                                                           | p.(Cys472Valfs*20)                                                 | LP                  | Heterozygous         | Inherited from affected father | PMID:38612618                                                     | Diagnosis confirmed                          | <i>TTN</i> : c.24617A>G; p.(Asn8206Ser) (VUS) heterozygous                                                               | Present  | 0.34          | -0.52           | -0.10            | 64                | 1.41 |
| P6      | Male   | HCM                         | 7               | SCA                        | # 115196 cardiomyopathy, familial hypertrophic, 3; CMH3                                       | <i>TPM1</i>                                         | c.248C>A                                                            | p.(Ala83Asp)                                                       | LP                  | Heterozygous         | Inherited from affected father | PMID:28771489                                                     | High risk diagnosis confirmed                | <i>KCNH2</i> : c.2531T>C; p.(Met844Thr) (VUS) heterozygous                                                               | Present  | 6.10          | 3.93            | 2.88             | 63                | 0.94 |
|         |        |                             |                 |                            |                                                                                               | <i>MYBPC3</i>                                       | c.1808T>C                                                           | p.(Ile603Thr)                                                      | LP                  | Heterozygous         | Unknown                        | PMIDs: 30919572, 33782553                                         |                                              |                                                                                                                          |          |               |                 |                  |                   |      |
| P7      | Male   | ACM                         | 18              |                            |                                                                                               |                                                     |                                                                     |                                                                    |                     |                      |                                |                                                                   | Inconclusive                                 | <i>JPH2</i> : c.1357C>T; p.(Pro453Ser) (VUS) heterozygous<br><i>SCN5A</i> : c.3751G>A; p.(Val1251Met) (VUS) heterozygous | Present  | 0.84          | 0.95            | 0.31             | 51                | 2.21 |
| P8      | Male   | HCM                         | 13              |                            | # 192600 cardiomyopathy, familial hypertrophic, 1; CMH1                                       | <i>MYH7</i>                                         | c.1357C>T                                                           | p.(Arg453Cys)                                                      | P                   | Heterozygous         | Inherited from affected father | PMIDs:8655135, 10662815                                           | Diagnosis confirmed                          |                                                                                                                          | Present  | 14.51         | 3.69            | -0.88            | 70                | 1.64 |
| P9      | Male   | ACM                         | 17              |                            | # 609040 arrhythmogenic right ventricular dysplasia,                                          | <i>PKP2</i>                                         | c.275T>A                                                            | p.(Leu92Ter)                                                       | P                   | Heterozygous         | Inherited from affected father | PMIDs:27532257, 24967631, 24832006                                | Diagnosis confirmed                          | <i>TRPM4</i> : c.1212C>A; p.(Asn404Lys) (VUS) heterozygous                                                               | Present  | 1.46          | 1.58            | 1.01             | 52                | 1.80 |

|     |        |     |     |                             |                                                                                    |        |           |                    |      |              |                                           |                                                                         |                                                           |                                                                                                                                                                                  |         |       |       |       |    |      |
|-----|--------|-----|-----|-----------------------------|------------------------------------------------------------------------------------|--------|-----------|--------------------|------|--------------|-------------------------------------------|-------------------------------------------------------------------------|-----------------------------------------------------------|----------------------------------------------------------------------------------------------------------------------------------------------------------------------------------|---------|-------|-------|-------|----|------|
|     |        |     |     |                             | familial, 9;<br>ARVD9                                                              |        |           |                    |      |              |                                           |                                                                         |                                                           |                                                                                                                                                                                  |         |       |       |       |    |      |
| P10 | Male   | HCM | 17  | SCA                         |                                                                                    |        |           |                    |      |              |                                           |                                                                         | Inconclusive                                              | RYR2: c.1154G>C;<br>p.(Gly385Ala)<br>(VUS) heterozygous                                                                                                                          | Absent  | 16.66 | 1.37  | -2.50 | 71 | 1.43 |
| P11 | Male   | DCM | 15  |                             | # 613426<br>cardiomyopathy,<br>dilated, 1S;<br>CMD1S                               | MYH7   | c.541G>A  | p.(Gly181Arg)      | LP   | Heterozygous | Inherited<br>from<br>unaffected<br>father | PMIDs:<br>34935411,<br>33500567                                         | Diagnosis<br>confirmed                                    | DSP: c.1297C>T;<br>p.(Arg433Cys)<br>(VUS) Heterozygous<br>DMD: c.8110T>C;<br>p.(Trp2704Arg<br>(VUS) heterozygous                                                                 | Absent  | -0.30 | -1.94 | 0.08  | 74 | 1.80 |
| P12 | Male   | DCM | 15  |                             | # 617047<br>cardiomyopathy,<br>dilated, 1pp,<br>included;<br>CMD1PP                | FLNC   | c.1414del | p.(Cys472Valfs*20) | LP   | Heterozygous | Inherited<br>from<br>affected<br>mother   | PMID:<br>38612618                                                       | Diagnosis<br>confirmed                                    |                                                                                                                                                                                  | Absent  | 1.34  | 0.58  | 1.47  | 71 | 1.87 |
| P13 | Male   | HCM | 16  |                             | # 192600<br>cardiomyopathy,<br>familial<br>hypertrophic, 1;<br>CMH1                | MYH7   | c.4259G>A | p.(Arg1420Gln)     | P    | Heterozygous | Inherited<br>from<br>unaffected<br>father | PMID:<br>21817903,<br>25132132,<br>25351510                             | Diagnosis<br>confirmed                                    |                                                                                                                                                                                  | Absent  | 5.82  | 5.06  | -2.04 | 73 | 1.81 |
| P14 | Male   | DCM | 0.1 | HF                          | # 613426<br>cardiomyopathy,<br>dilated, 1S;<br>CMD1S                               | MYH7   | c.602T>A  | p.(Ile201Thr)      | P    | Heterozygous | De Novo                                   | PMID:<br>24714796                                                       | Diagnosis<br>confirmed                                    | CAV3: c.244G>A;<br>p.(Val82Ile) (VUS)<br>heterozygous                                                                                                                            | Absent  | -0.37 | -0.25 | 1.91  | 45 | 0.22 |
| P15 | Male   | HCM | 1   | ICD<br>appropriate<br>shock | # 115197<br>cardiomyopathy,<br>familial<br>hypertrophic, 4;<br>CMH4                | MYBPC3 | c.1484G>A | p.(Arg495Gln)      | P    | Heterozygous | Inherited<br>from<br>affected<br>mother   | PMIDs:<br>11499718,<br>20019025,<br>22857948,<br>23396983,<br>24093860. | Diagnosis<br>confirmed                                    | SCN5A: c.3841G>T;<br>p.(Val1281Phe)<br>(VUS) heterozygous<br>ACTN2: c.2552G>A;<br>p.(Arg851His)<br>(VUS) heterozygous<br>DSG2: c.2800A>G;<br>(p.Ile934Val) (VUS)<br>heterozygous | Present | 10.11 | -0.31 | -0.28 | 77 | 0.47 |
| P16 | Male   | HCM | 13  |                             | # 192600<br>cardiomyopathy,<br>familial<br>hypertrophic, 1;<br>CMH1                | MYH7   | c.2167C>G | p.(Arg723Gly)      | P    | Heterozygous | Inherited<br>from<br>affected<br>father   | PMIDs:<br>11113006,<br>17097032,<br>19150014,<br>20865685,<br>24093860. | Diagnosis<br>confirmed                                    | KCNH2: c.607G>A;<br>p.(Ala203Thr)<br>(VUS) heterozygous<br>FKTN c.703C>A;<br>p.(Pro235Thr)<br>(VUS) heterozygous<br>CACNA1C:<br>c.898A>G;<br>p.(Asn300Asp)<br>(VUS) heterozygous | Absent  | 5.11  | 1.37  | 0.34  | 68 | 1.43 |
| P17 | Female | HCM | 13  |                             | # 192600<br>cardiomyopathy,<br>familial<br>hypertrophic, 1;<br>CMH1                | MYH7   | c.1207C>G | p.(Arg403Gly)      | LP   | Heterozygous | Inherited<br>from<br>affected<br>father   | PMIDs:<br>32344918,<br>30950055                                         | Diagnosis<br>confirmed                                    |                                                                                                                                                                                  | Present | 14.38 | 2.19  | 0.36  | 70 | 1.49 |
| P18 | Male   | HCM | 7   | SCA                         | # 115197<br>cardiomyopathy,<br>familial<br>hypertrophic, 4;<br>CMH4                | MYBPC3 | c.1483C>G | p.(Arg495Gly)      | P    | Heterozygous | Inherited<br>from<br>affected<br>mother   | PMIDs:<br>18403758,<br>19659763,<br>20624503,<br>22574137               | Diagnosis<br>confirmed                                    | TTN: c.43359T>A;<br>p.(Asp14453Glu)<br>(VUS) heterozygous                                                                                                                        | Present | 8.92  | 7.49  | -2.19 | 74 | 0.44 |
| P19 | Male   | HCM | 4   |                             | Potential #<br>617047<br>cardiomyopathy,<br>familial<br>hypertrophic, 26;<br>CMH26 | FLNC   | c.676G>A  | p.(Asp226Asn)      | VUS* | Heterozygous | Inherited<br>from<br>affected<br>mother   | Novel                                                                   | Potential<br>associated<br>gene-<br>variant<br>identified | DMD: c.1375G>A;<br>p.(Glu459Lys)<br>(VUS) hemizygous                                                                                                                             | Absent  | 6.56  | 1.47  | 0.15  | 78 | 0.67 |

|     |        |     |     |     |                                                                                                         |              |           |                |      |              |                                |                                                                 |                                              |                                                                                                                        |         |       |      |       |    |      |
|-----|--------|-----|-----|-----|---------------------------------------------------------------------------------------------------------|--------------|-----------|----------------|------|--------------|--------------------------------|-----------------------------------------------------------------|----------------------------------------------|------------------------------------------------------------------------------------------------------------------------|---------|-------|------|-------|----|------|
| P20 | Female | HCM | 17  |     | Potential # 612158 cardiomyopathy, dilated, IAA, with or without left ventricular noncompaction; CMD1AA | <i>ACTN2</i> | c.1748A>C | p.(Glu583Ala)  | VUS* | Heterozygous | No                             | PMIDs: 28790153                                                 | Potential associated gene-variant identified | <i>MYBPC3</i> : c.976C>G; p.(Arg326Gly) (VUS) heterozygous                                                             | Present | 17.01 | 3.05 | -0.52 | 68 | 1.53 |
| P21 | Male   | HCM | 13  |     | # 192600 cardiomyopathy, familial hypertrophic, 1; CMH1                                                 | <i>MYH7</i>  | c.2167C>T | p.(Arg723Cys)  | P    | Heterozygous | No                             | PMIDs: 1430197, 9829907, 12117842, 16199542, 25935763, 29709087 | Diagnosis confirmed                          | <i>BAG3</i> : c.452G>A; p.(Cys151Tyr) (VUS) heterozygous<br><i>KCNQ1</i> : c.136G>A; p.(Ala46Thr) (VUS) heterozygous   | Absent  | 11.83 | 2.32 | -0.97 | 69 | 1.44 |
| P22 | Female | ACM | 14  |     | # 607450 arrhythmogenic right ventricular dysplasia, familial, 8; ARVD8                                 | <i>DSP</i>   | c.868G>A  | p.(Glu290Lys)  | LP   | Heterozygous | Inherited from affected mother | PMID:39288222                                                   | Diagnosis confirmed                          | <i>TTN</i> : c.91423A>G p.(Ser30475Gly) (VUS) heterozygous<br><i>PITX2</i> : c.503A>G p.(Asn168Ser) (VUS) heterozygous | Present | 1.28  | 1.39 | 1.92  | 52 | 1.42 |
| P23 | Male   | HCM | 14  | SCA | # 115195 cardiomyopathy, familial hypertrophic, 2; CMH2                                                 | <i>TNNT2</i> | c.860G>A  | p.(Trp287Ter)  | P    | Heterozygous | Unknown                        | PMIDs: 12707239, 20439259                                       | Diagnosis confirmed                          | <i>DSP</i> : c.1618C>A; p.(Leu540Ile) (VUS) heterozygous<br><i>SCN5A</i> : c.1398G>T; p.(Leu466Phe) (VUS) heterozygous | Present | 19.48 | 2.00 | -1.91 | 71 | 1.58 |
| P24 | Male   | HCM | 2   |     |                                                                                                         |              |           |                |      |              |                                |                                                                 | Inconclusive                                 | <i>AKAP9</i> : c.11077T>C; p.(Ser3693Pro) (VUS) heterozygous                                                           | Present | 20.00 | 1.60 | -2.57 | 68 | 0.65 |
| P25 | Male   | ACM | 5   |     | # 609040 arrhythmogenic right ventricular dysplasia, familial, 9; ARVD9                                 | <i>PKP2</i>  | c.1297C>T | p.(Arg413Ter)  | P    | Heterozygous | Inherited from affected mother | PMIDs:24967631, 31156706                                        | Diagnosis confirmed                          | <i>TTN</i> : c.95984T>C; p.(Val31995Ala) (VUS) heterozygous                                                            | Absent  | 1.06  | 1.18 | 0.68  | 65 | 0.74 |
| P26 | Female | HCM | 7   |     | cardiomyopathy, familial hypertrophic, 7; CMH7                                                          | <i>TNNT3</i> | c.433C>T  | p.(Arg145Trp)  | P    | Heterozygous | Inherited from affected father | PMIDs: 12531876, 15607392, 15992656, 16288990                   | Diagnosis confirmed                          | <i>PKP2</i> : c.1468C>T; p.(Arg490Trp) (VUS) heterozygous                                                              | Present | 8.09  | 1.49 | 2.25  | 69 | 0.98 |
| P27 | Female | ACM | 14  |     | # 607450 arrhythmogenic right ventricular dysplasia, familial, 8; ARVD8                                 | <i>DSP</i>   | c.3337C>T | p.(Arg1113Ter) | P    | Heterozygous | Inherited from affected mother | PMIDs:28527814, 30382575, 31386562, 31402444                    | Diagnosis confirmed                          |                                                                                                                        | Present | 1.40  | 1.52 | -1.17 | 51 | 1.83 |
| P28 | Male   | HCM | 1.5 |     |                                                                                                         |              |           |                |      |              |                                |                                                                 | Inconclusive                                 | <i>GLRA1</i> : c.92C>T; p.(Ser31Phe) (VUS) heterozygous                                                                | Absent  | 4.52  | 6.00 | -1.81 | 68 | 0.59 |
| P29 | Male   | HCM | 7   | SCA | # 115196 cardiomyopathy, familial hypertrophic, 3; CMH3                                                 | <i>TPM1</i>  | c.248C>A  | p.(Ala83Asp)   | LP   | Heterozygous | Inherited from affected mother | PMID: 28771489                                                  | Diagnosis confirmed                          | <i>RYR2</i> : c.14102T>C; p.(Ile4701Thr) (VUS) heterozygous                                                            | Present | 0.34  | 0.45 | -1.59 | 66 | 0.96 |
| P30 | Male   | HCM | 11  |     | # 115195 cardiomyopathy, familial hypertrophic, 2; CMH2                                                 | <i>TNNT2</i> | c.305G>A  | p.(Arg102Gln)  | P    | Heterozygous | Unknown                        | PMID: 7898523, 8205619, 8951566                                 | Diagnosis confirmed                          |                                                                                                                        | Present | 1.39  | 1.50 | -1.53 | 69 | 1.37 |

|     |        |         |     |                       |                                                                         |               |                         |                             |      |                       |                                                                                    |                                                       |                                              |                                                                                                                           |         |       |       |       |    |      |
|-----|--------|---------|-----|-----------------------|-------------------------------------------------------------------------|---------------|-------------------------|-----------------------------|------|-----------------------|------------------------------------------------------------------------------------|-------------------------------------------------------|----------------------------------------------|---------------------------------------------------------------------------------------------------------------------------|---------|-------|-------|-------|----|------|
| P31 |        | HCM     | 0.9 |                       | # 192600 cardiomyopathy, familial hypertrophic, 1; CMH1                 | <i>MYH7</i>   | c.2156G>A               | p.(Arg719Gln)               | P    | Heterozygous          | Unknown                                                                            | PMID: 32403337, 31513939                              | Diagnosis confirmed                          |                                                                                                                           | Absent  | 6.40  | 6.51  | -0.54 | 67 | 0.53 |
| P32 | Female | DCM     | 0.5 | HF                    | # 601494 cardiomyopathy, dilated, 1D; CMD1D                             | <i>TNNT2</i>  | c.421C>T                | p.(Arg141Trp)               | P    | Heterozygous          | Inherited from affected father                                                     | PMID:34540771, 33906374, 32746448, 32758068, 34076677 | Diagnosis confirmed                          | <i>NEXN</i> : c.1739G>A; p.Gly(580Glu) (VUS) heterozygous                                                                 | Absent  | -1.38 | -1.27 | 3.73  | 33 | 0.35 |
| P33 | Female | HCM     | 0.4 |                       | # 115195 cardiomyopathy, familial hypertrophic, 2; CMH2                 | <i>TNNT2</i>  | c.817A>C                | p.(Lys273Gln)               | LP   | Heterozygous          | Inherited from affected mother                                                     | PMID:34137518                                         | Diagnosis confirmed                          | <i>NOTCH1</i> : c.2675G>A; p.(Arg892His) (VUS) heterozygous<br><i>ANK2</i> : c.4835C>T; p.(Thr1612Ile) (VUS) heterozygous | Present | 23.24 | 0.26  | -4.30 | 80 | 1.03 |
| P34 | Male   | HCM     | 1.5 |                       | # 192600 cardiomyopathy, familial hypertrophic, 1; CMH1                 | <i>MYH7</i>   | c.2146G>A               | p.(Gly716Arg)               | P    | Heterozygous          | <i>De Novo</i>                                                                     | PMID:23283745, 24093860, 25935763, 27161882           | Diagnosis confirmed                          |                                                                                                                           | Absent  | 10.14 | 2.72  | 1.46  | 66 | 0.47 |
| P35 | Male   | DCM     | 17  | VF/VT                 | # 604145 cardiomyopathy, dilated, 1G; CMD1G                             | <i>TTN</i>    | c.95655del              | p.(Glu31886Asnfs*3)         | LP   | Heterozygous          | Inherited from affected father                                                     | PMID:38438525                                         | Diagnosis confirmed                          | <i>KCNJ5</i> : c.409G>A; p.(Val137Met) (VUS) heterozygous                                                                 | Present | -0.25 | -0.14 | 1.36  | 42 | 1.76 |
| P36 | Female | HCM/RCM | 1   | ICD appropriate shock | # 115197 cardiomyopathy, familial hypertrophic, 4; CMH4                 | <i>MYBPC3</i> | c.[2670dup]+[c.2274C>T] | p.[(Arg891Alafs*160)+p.(?)] | P    | Compound Heterozygous | First inherited from the affected father and the second from the unaffected mother | PMIDs: 24093860, 22765922, 37821546                   | High risk diagnosis confirmed                |                                                                                                                           | Absent  | 13.69 | 12.26 | -1.66 | 70 | 0.44 |
| P37 | Female | DCM     | 0.5 | HF/Tx                 | Potential # 192600 cardiomyopathy, familial hypertrophic, 1; CMH1       | <i>MYH7</i>   | c.5519T>C               | p.(Met1840Thr)              | VUS* | Heterozygous          | No                                                                                 | PMID:27247418                                         | Potential associated gene-variant identified | <i>TNNC1</i> : c.376G>A; p.(Glu126Lys) (VUS) heterozygous<br><i>KCNJ5</i> : c.674G>A; p.Arg225His (VUS) heterozygous      | Present | -1.21 | 0.65  | 14.89 | 30 | 0.32 |
| P38 | Male   | DCM     | 0.1 |                       | Potential # 613424 cardiomyopathy, dilated, 1R; CMD1R                   | <i>ACTC1</i>  | c.778C>T                | p.(Pro260Ser)               | VUS* | Heterozygous          | Inherited from unaffected mother                                                   | Novel                                                 | Potential associated gene-variant identified | <i>MYH6</i> : c.1753G>A; p.(Gly585Ser) (VUS) heterozygous<br><i>PRKAG2</i> : c.428C>T; p.(Ser143Leu) (VUS) heterozygous   | Absent  | -0.95 | -0.84 | 7.36  | 45 | 0.29 |
| P39 | Female | ACM     | 13  | SCA                   | # 607450 arrhythmogenic right ventricular dysplasia, familial, 8; ARVD8 | <i>DSP</i>    | c.3337C>T               | p.(Arg1113Ter)              | P    | Heterozygous          | Inherited from affected mother                                                     | PMIDs: 28527814, 30382575, 31386562, 31402444         | Diagnosis confirmed                          | <i>LAMA4</i> : c.1256T>C; p.(Met419Thr) (VUS) heterozygous<br><i>AKAP9</i> : c.6742G>C; p.(Glu2248Gln) (VUS) heterozygous | Present | 1.19  | 1.30  | -0.04 | 54 | 1.46 |
| P40 | Female | HCM     | 0.1 |                       | Potential # 617047 cardiomyopathy, familial hypertrophic, 26; CMH26     | <i>FLNC</i>   | c.2842G>A               | p.(Gly948Arg)               | VUS* | Heterozygous          | Inherited from unaffected mother                                                   | Novel                                                 | Potential associated gene-variant identified | <i>TLX3</i> : c.194G>T; p.Gly65Val (VUS) heterozygous                                                                     | Absent  | 7.74  | 3.80  | -5.24 | 71 | 0.22 |



|     |            |     |     |     |                                                                                        |               |                |                      |      |                  |                                         |                                                                                    |                                                           |                                                                                                                                                                                                      |         |           |           |           |    |          |
|-----|------------|-----|-----|-----|----------------------------------------------------------------------------------------|---------------|----------------|----------------------|------|------------------|-----------------------------------------|------------------------------------------------------------------------------------|-----------------------------------------------------------|------------------------------------------------------------------------------------------------------------------------------------------------------------------------------------------------------|---------|-----------|-----------|-----------|----|----------|
| P48 | Male       | HCM | 17  |     | # 115197<br>cardiomyopathy,<br>familial<br>hypertrophic, 4;<br>CMH4                    | <i>MYBPC3</i> | c.2539_2544del | p.(Tyr847_Ala848del) | LP   | Heterozygo<br>us | Inherited<br>from<br>affected<br>mother | Novel                                                                              | Diagnosis<br>confirmed                                    |                                                                                                                                                                                                      | Absent  | 10.23     | 2.44      | -1.80     | 77 | 1.8<br>0 |
| P49 | Male       | ACM | 15  | SCD | # 607450<br>arrhythmogenic<br>right ventricular<br>dysplasia,<br>familial, 8;<br>ARVD8 | <i>DSP</i>    | c.868G>A       | p.(Glu290Lys)        | LP   | Heterozygo<br>us | Inherited<br>from<br>affected<br>mother | PMIDs:<br>39288222                                                                 | Diagnosis<br>confirmed                                    | <i>PKP2</i> : c.184C>A;<br>p.(Gln62Lys) (VUS)<br>heterozygous                                                                                                                                        | Absent  | 1.45      | 1.56      | 1.45      | 55 | 1.81     |
| P50 | Femal<br>e | HCM | 14  |     | # 192600<br>cardiomyopathy,<br>familial<br>hypertrophic, 1;<br>CMH1                    | <i>MYH7</i>   | c.2167C>G      | p.(Arg723Gly)        | P    | Heterozygo<br>us | Inherited<br>from<br>affected<br>father | PMID:<br>1113006,<br>17097032,<br>19150014,<br>20865685,<br>24093860.              | Diagnosis<br>confirmed                                    |                                                                                                                                                                                                      | Present | 4.92      | 1.24      | -0.9<br>0 | 68 | 1.4<br>9 |
| P51 | Femal<br>e | HCM | 18  |     | # 192600<br>cardiomyopathy,<br>familial<br>hypertrophic, 1;<br>CMH1                    | <i>MYH7</i>   | c.2167C>G      | p.(Arg723Gly)        | P    | Heterozygo<br>us | Inherited<br>from<br>affected<br>father | PMID:<br>1113006,<br>17097032,<br>19150014,<br>20865685,<br>24093860.              | Diagnosis<br>confirmed                                    |                                                                                                                                                                                                      | Absent  | 4.95      | -0.2<br>0 | -1.11     | 67 | 1.81     |
| P52 | Male       | DCM | 13  |     |                                                                                        |               |                |                      |      |                  |                                         |                                                                                    | Inconclusi<br>ve                                          | <i>MYL2</i> : c.89A>C;<br>p.(Lys30Thr) (VUS)<br>heterozygous                                                                                                                                         | Absent  | 0.92      | 1.03      | -1.00     | 62 | 1.6<br>0 |
| P53 | Femal<br>e | HCM | 13  |     | # 115197<br>cardiomyopathy,<br>familial<br>hypertrophic, 4;<br>CMH4                    | <i>MYBPC3</i> | c.3234G>A      | p.(Trp1078)          | P    | Heterozygo<br>us | Inherited<br>from<br>affected<br>father | PMIDs:<br>25740977,<br>25740977                                                    | Diagnosis<br>confirmed                                    | <i>TPM1</i> : c.841A>G;<br>p.(Met281Val)<br>(VUS) heterozygous<br><i>TTN</i> : c.79919A>T;<br>p.(Tyr2664Phe<br>(VUS) heterozygous<br><i>PKP2</i> : c.2204G>A;<br>p.(Arg735Gln)<br>(VUS) heterozygous | Absent  | 14.43     | 0.02      | -1.17     | 74 | 1.6<br>6 |
| P54 | Male       | HCM | 0.3 |     | # 115197<br>cardiomyopathy,<br>familial<br>hypertrophic, 4;<br>CMH4                    | <i>MYBPC3</i> | c.2308+1G>A    | p.(?)                | P    | Heterozygo<br>us | Inherited<br>from<br>affected<br>father | PMIDs:<br>9048664,<br>18957093,<br>21088121,<br>9048664,<br>18957093,<br>21088121. | Diagnosis<br>confirmed                                    |                                                                                                                                                                                                      | Absent  | 5.49      | -1.22     | -1.00     | 75 | 0.3<br>4 |
| P55 | Femal<br>e | HCM | 18  |     | # 192600<br>cardiomyopathy,<br>familial<br>hypertrophic, 1;<br>CMH1                    | <i>MYH7</i>   | c.1357C>T      | p.(Arg453Cys)        | P    | Heterozygo<br>us | Inherited<br>from<br>affected<br>father | PMIDs:8655135<br>,<br>PMID:10662815                                                | Diagnosis<br>confirmed                                    |                                                                                                                                                                                                      | Absent  | -0.2<br>9 | 0.69      | -1.55     | 64 | 1.8<br>0 |
| P56 | Male       | HCM | 14  |     | Potential #<br>613690<br>cardiomyopathy,<br>familial<br>hypertrophic, 7;<br>CMH7       | <i>TNNI3</i>  | c.244C>A       | p.(Pro82Thr)         | VUS* | Heterozygo<br>us | No                                      | PMIDs:<br>28166811                                                                 | Potential<br>associated<br>gene-<br>variant<br>identified |                                                                                                                                                                                                      | Absent  | 4.11      | 1.35      | -1.76     | 75 | 1.4<br>4 |
| P57 | Male       | HCM | 15  |     | Potential #<br>613690<br>cardiomyopathy,<br>familial<br>hypertrophic, 7;<br>CMH7       | <i>TNNI3</i>  | c.244C>A       | p.(Pro82Thr)         | VUS* | Heterozygo<br>us | No                                      | PMIDs:<br>28166811                                                                 | Potential<br>associated<br>gene-<br>variant<br>identified | <i>FLNC</i> : c.1568T>C;<br>p.(Val523Ala)<br>(VUS) heterozygous                                                                                                                                      | Absent  | 4.40      | 1.55      | -1.46     | 67 | 1.3<br>5 |

|     |        |     |    |                                                         |             |            |                 |    |              |                                                   |                                      |                     |                                                                                                                                                                                         |         |      |       |       |    |      |
|-----|--------|-----|----|---------------------------------------------------------|-------------|------------|-----------------|----|--------------|---------------------------------------------------|--------------------------------------|---------------------|-----------------------------------------------------------------------------------------------------------------------------------------------------------------------------------------|---------|------|-------|-------|----|------|
| P58 | Female | HCM | 0  |                                                         |             |            |                 |    |              |                                                   |                                      | Inconclusive        | <i>HCN4</i> : c.3187C>T; p.(Pro1063Ser) (VUS) heterozygous<br><i>TTN</i> : c.53992G>A; p.(Val1799Ile) (VUS) heterozygous<br><i>SLC22A5</i> : c.605T>C; p.Leu202Pro (VUS) heterozygous   | Absent  | 1.90 | 4.10  | 4.22  | 68 | 0.21 |
| P59 | Female | HCM | 0  | # 192600 cardiomyopathy, familial hypertrophic, 1; CMH1 | <i>MYH7</i> | c.2674C>A  | p.(Gln892Lys)   | LP | Heterozygous | Inherited from affected mother                    | PMIDs: 28840316, 23283745            | Diagnosis confirmed |                                                                                                                                                                                         | Absent  | 2.73 | -0.22 | -2.19 | 71 | 0.22 |
| P60 | Female | ACM | 17 |                                                         |             |            |                 |    |              |                                                   |                                      | Inconclusive        | <i>DSP</i> : c.4775A>G; p.(Lys1592Arg) (VUS) heterozygous<br><i>LMNA</i> : c.1364G>A; p.(Arg455His) VUS heterozygous<br><i>TP63</i> : c.2005C>T; p.(Arg669Cys) VUS heterozygous         | Present | 1.62 | 1.73  | 0.34  | 61 | 1.71 |
| P61 | Female | HCM | 10 | # 192600 cardiomyopathy, familial hypertrophic, 1; CMH1 | <i>MYH7</i> | c.1750G>T  | p.(Gly584Cys)   | P  | Heterozygous | Inherited from affected mother                    | PMIDs: 39605252, 31308319            | Diagnosis confirmed | <i>SCN10A</i> : c.3417G>C; p.(Trp1139Cys) (VUS) heterozygous                                                                                                                            | Absent  | 6.32 | 0.05  | -0.54 | 80 | 1.12 |
| P62 | Male   | DCM | 18 | # 604145 cardiomyopathy, dilated, 1G; CMD1G             | <i>TTN</i>  | c.41467C>T | p.(Arg13823Ter) | P  | Heterozygous | Inherited from unaffected mother (affected uncle) | PMIDs: 30471092, 31737537, 34088380. | Diagnosis confirmed | <i>TRPM4</i> : c.472C>G; p.(Leu158Val) (VUS) heterozygous<br><i>SCN5A</i> : c.5333C>T; p.(Thr1778Met) (VUS) heterozygous<br><i>EYA4</i> : c.252T>A; p.(Ser84Arg) (VUS) heterozygous     | Absent  | 1.82 | 1.01  | 1.17  | 56 | 1.61 |
| P63 | Male   | DCM | 14 |                                                         |             |            |                 |    |              |                                                   |                                      | Inconclusive        | <i>TTN</i> : c.74152G>A; p.(Val24718Ile) (VUS) heterozygous<br><i>TTN</i> : c.73760T>C; p.(Ile24587Thr) (VUS) heterozygous<br><i>SCN4B</i> : c.542T>C; p.(Leu181Pro) (VUS) heterozygous | Absent  | 2.88 | 1.29  | 0.95  | 60 | 1.97 |

|     |        |     |     |       |                                                                                            |               |                |                |      |                       |                                  |                                                                   |                                              |                                                                                                                                                                                                                                                       |         |       |       |       |    |      |
|-----|--------|-----|-----|-------|--------------------------------------------------------------------------------------------|---------------|----------------|----------------|------|-----------------------|----------------------------------|-------------------------------------------------------------------|----------------------------------------------|-------------------------------------------------------------------------------------------------------------------------------------------------------------------------------------------------------------------------------------------------------|---------|-------|-------|-------|----|------|
| P64 | Male   | DCM | 12  | VF/VT | Potential # 616117 cardiac conduction disease with or without dilated cardiomyopathy; CCDD | <i>TNNI3K</i> | c.2099G>C      | p.(Arg700Pro)  | VUS* | Heterozygous          | Inherited from unaffected mother | Novel                                                             | Potential associated gene-variant identified | <i>PPP1R13L</i> : c.1294C>G; p.(Pro432Ala) (VUS) heterozygous<br><i>MYH6</i> : c.3872G>A; p.(Arg1291Gln) (VUS) heterozygous<br><i>DSG2</i> : c.1820A>G; p.(Tyr607Cys) (VUS) heterozygous<br><i>DMD</i> : c.4170C>G; p.(Asp1390Glu) (VUS) heterozygous | Absent  | 1.39  | 0.52  | 1.36  | 53 | 1.37 |
| P65 | Male   | HCM | 13  | SCA   | # 115195 cardiomyopathy, familial hypertrophic, 2; CMH2                                    | <i>TNNT2</i>  | c.890G>A       | p.(Trp287Ter)  | P    | Compound Heterozygous | Inherited from affected mother   | PMIDs: 20439259, 22857948                                         | High risk diagnosis confirmed                |                                                                                                                                                                                                                                                       | Present | 21.53 | 3.31  | -1.45 | 72 | 1.42 |
|     |        |     |     |       | # 192600 cardiomyopathy, familial hypertrophic, 1; CMH1                                    | <i>MYH7</i>   | c.2273T>C      | p.(Phe758Ser)  | LP   | Compound Heterozygous | Inherited from unaffected father | PMID: 32880476                                                    |                                              |                                                                                                                                                                                                                                                       |         |       |       |       |    |      |
| P66 | Female | DCM | 0.5 | HF    | Potential # 613424 cardiomyopathy, dilated, 1R; CMD1R                                      | <i>DES</i>    | c.326A>G       | p.(Lys109Arg)  | VUS* | Heterozygous          | Inherited from unaffected father | PMID: 32403337                                                    | Potential associated gene-variant identified | <i>TNNT2</i> : c.529G>T; p.(Ala177Ser) (VUS) heterozygous<br><i>NKX2-5</i> : c.890_891dupTC; p.(Gly298Serfs*4) (VUS) heterozygous                                                                                                                     | Absent  | 0.41  | 0.52  | 11.40 | 25 | 0.34 |
| P67 | Male   | HCM | 17  |       | # 619402 cardiomyopathy, familial hypertrophic, 28; CMH28                                  | <i>FHOD3</i>  | c.1583A>G      | p.(Tyr528Cys)  | LP   | Heterozygous          | Inherited from unaffected father | PMID: 30442288                                                    | Diagnosis confirmed                          | <i>ALPK3</i> : c.2054A>G; p.(Lys685Arg) (VUS) heterozygous                                                                                                                                                                                            | Present | 15.75 | 3.43  | -1.90 | 80 | 1.75 |
| P68 | Female | DCM | 0   |       | # 613426 cardiomyopathy, dilated, 1S; CMD1S                                                | <i>MYH7</i>   | c.5186_5188del | p.(Lys1729del) | P    | Heterozygous          | Inherited from affected mother   | PMID: 12975303, 15322983, 20733148                                | Diagnosis confirmed                          |                                                                                                                                                                                                                                                       | Absent  | 3.12  | -0.59 | 0.50  | 53 | 0.26 |
| P69 | Male   | DCM | 15  |       | Potential * 191040 troponin c, slow; TNNC1                                                 | <i>TNNC1</i>  | c.121C>A       | p.(Leu41Met)   | VUS* | Heterozygous          | Inherited from unaffected mother | Novel                                                             | Potential associated gene-variant identified |                                                                                                                                                                                                                                                       | Absent  | 1.59  | 1.70  | 0.52  | 61 | 1.73 |
| P70 | Female | HCM | 13  |       | # 115197 cardiomyopathy, familial hypertrophic, 4; CMH4                                    | <i>MYBPC3</i> | c.2149-1G>A    | p.(?)          | P    | Heterozygous          | Inherited from affected father   | PMIDs: 27532257, 30393631, 23782526, 37652022, 36129056, 34588271 | Diagnosis confirmed                          |                                                                                                                                                                                                                                                       | Absent  | 4.34  | 3.55  | -3.19 | 75 | 1.70 |
| P71 | Female | HCM | 14  |       | # 115197 cardiomyopathy, familial hypertrophic, 4; CMH4                                    | <i>MYBPC3</i> | c.2401C>T      | p.(Gln801Ter)  | LP   | Heterozygous          | No                               | Novel                                                             | Diagnosis confirmed                          |                                                                                                                                                                                                                                                       | Absent  | 12.07 | 3.41  | -1.59 | 76 | 1.39 |
| P72 | Male   | HCM | 12  |       | Potential # 115197 cardiomyopathy, familial hypertrophic, 4; CMH4                          | <i>MYBPC3</i> | c.3779G>T      | p.(Gly1260Val) | VUS* | Heterozygous          | Unknown                          | Novel                                                             | Potential associated gene-variant identified |                                                                                                                                                                                                                                                       | Absent  | 13.10 |       | -4.62 | 76 | 1.96 |

|     |        |     |    |     |                                                                                                                |               |           |               |      |              |                                |                                    |                                              |                                                                                                                       |         |       |       |       |    |      |
|-----|--------|-----|----|-----|----------------------------------------------------------------------------------------------------------------|---------------|-----------|---------------|------|--------------|--------------------------------|------------------------------------|----------------------------------------------|-----------------------------------------------------------------------------------------------------------------------|---------|-------|-------|-------|----|------|
| P73 | Female | DCM | 12 |     | Potential # 163800 sick sinus syndrome 2 with or without cardiac noncompaction and/or ascending aorta dilation | <i>HCN4</i>   | c.1454C>T | p.(Ala485Val) | VUS* | Heterozygous | Inherited from affected mother | PMID: 28254188, 34540771           | Potential associated gene-variant identified |                                                                                                                       | Absent  | -0.82 | -1.65 | 0.72  | 65 | 1.53 |
| P74 | Male   | DCM | 18 |     | Potential # 615396 cardiomyopathy, dilated, imm, included; CMDiMM, included                                    | <i>MYBPC3</i> | c.1321G>A | p.(Glu441Lys) | VUS* | Heterozygous | No                             | PMID: 37652022, 30972196           | Potential associated gene-variant identified | <i>MYBPC3</i> : c.836G>C; p.(Gly279Ala) (VUS) heterozygous                                                            | absence | 0.99  | 1.11  | 1.25  | 61 | 2.10 |
| P75 | Female | DCM | 18 |     | # 601154 cardiomyopathy, dilated, iE; CMDiE                                                                    | <i>SCN5A</i>  | c.2440C>T | p.(Arg814Trp) | P    | Heterozygous | Inherited from affected father | PMID 38464806                      | Diagnosis confirmed                          | <i>MYBPC3</i> : c.1010C>T; p.(Ala337Val) (VUS) heterozygous                                                           | Absent  | 2.91  | 0.21  | 0.20  | 66 | 1.54 |
| P76 | Male   | DCM | 6  | SCA | # 601494 cardiomyopathy, dilated, iD; CMDiD                                                                    | <i>TNNI2</i>  | c.299T>A  | p.(Ile100Asn) | P    | Heterozygous | <i>De Novo</i>                 | PMID: 18612386, 32098556, 33025817 | Diagnosis confirmed                          | <i>DSC2</i> : c.1747A>G; p.(Ile583Val) (VUS) heterozygous<br><i>JPH2</i> : c.692G>A; p.(Arg231Gln) (VUS) heterozygous | Absent  | 7.19  | 2.34  | 0.89  | 48 | 0.76 |
| P77 | Male   | HCM | 15 |     |                                                                                                                |               |           |               |      |              |                                |                                    | Negative                                     |                                                                                                                       | Absent  | 10.37 | 1.14  | -2.07 | 68 | 1.54 |
| P78 | Male   | HCM | 1  |     |                                                                                                                |               |           |               |      |              |                                |                                    | Negative                                     |                                                                                                                       | Present | 9.64  | 2.13  | -1.97 | 81 | 1.98 |
| P79 | Male   | HCM | 18 |     |                                                                                                                |               |           |               |      |              |                                |                                    | Negative                                     |                                                                                                                       | Absent  | 4.62  | 2.18  | -0.11 | 68 | 1.95 |
| P80 | Male   | ACM | 16 |     |                                                                                                                |               |           |               |      |              |                                |                                    | Negative                                     |                                                                                                                       | Absent  | 2.39  | 2.50  | 0.62  | 65 | 1.77 |
| P81 | Male   | DCM | 11 | HF  |                                                                                                                |               |           |               |      |              |                                |                                    | Negative                                     |                                                                                                                       | Absent  | -1.48 | -1.37 | 1.01  | 25 | 1.33 |
| P82 | Female | HCM | 1  |     |                                                                                                                |               |           |               |      |              |                                |                                    | Negative                                     |                                                                                                                       | Present | 15.53 | 13.45 | -2.21 | 68 | 1.03 |
| P83 | Male   | HCM | 18 |     |                                                                                                                |               |           |               |      |              |                                |                                    | Negative                                     |                                                                                                                       | Absent  | 3.99  | 4.10  | -1.44 | 64 | 1.85 |
| P84 | Male   | HCM | 13 |     |                                                                                                                |               |           |               |      |              |                                |                                    | Negative                                     |                                                                                                                       | Absent  | 15.90 | 2.41  | -2.15 | 78 | 1.40 |

HCM, hypertrophic cardiomyopathy; DCM, dilated cardiomyopathy; ACM, arrhythmogenic cardiomyopathy; VT/VF, ventricular tachycardia/fibrillation; HF, heart failure stages C and D; HTx, heart transplant; SCD, sudden cardiac death; SCA, sudden cardiac arrest; IVS, thickness of the interventricular septum; LVPW-score, left ventricular posterior wall, standardized for age and body size; LVEDD z-score reflects the left ventricular end-diastolic diameter adjusted for body size; LVEF (%) corresponds to left ventricular ejection fraction calculated using the Simpson biplane method; BSA, body surface area. P, pathogenic; LP, likely pathogenic; VUS, variant of uncertain significance; VUS\*: applying an internal classification, these variants were reclassified as VUS-LP (with a potential deleterious role).
